# Supplementary material for: A planar rigid steric group-modified spiropyran derivative with photochromism and mechanochromism for optical printing applications
Source: Royal Society of Chemistry journal article supplement (doi:10.1039/d4tc02555e), 2024-01-01
Supplement: d4tc02555e1.pdf [file d4tc02555e1.pdf]

## Supporting Information

### **Planar Rigid Steric Groups Modified Spiropyran Derivative with Photochromism and Mechanochromism for Optical Printing Application**

Bing Fang<sup>a</sup>, Mingyu Fan<sup>b</sup>, Han Gao<sup>a</sup>, Yu Wang<sup>a</sup>, Dahai Gao<sup>a</sup>, Jianxiang Yu<sup>a</sup>, Meizhen Yin<sup>b\*</sup>, Yuhua Dai<sup>a\*</sup>

<sup>a</sup>Beijing Key Laboratory of Special Elastomer Composite Materials, College of New Materials and Chemical Engineering, Beijing Institute of Petrochemical Technology, Beijing 102617 (China)

<sup>b</sup>State Key Laboratory of Chemical Resource Engineering, Beijing Laboratory of Biomedical Materials, Beijing University of Chemical Technology, Beijing 100029, PR China

Corresponding Author: yinmz@mail.buct.edu.cn; daiyuhua@bipt.edu.cn

#### **Materials**

All starting materials were purchased from Innochem and used without further purification. The solvents for synthesis were common commercial grade and were used as received.

#### **Instruments**

<sup>1</sup>H NMR and <sup>13</sup>C NMR spectra were recorded on a Bruker 400 (400 MHz) spectrometer at room temperature. Fluorescence studies were performed on a fluorescence spectrophotometer (FS-5). UV-vis spectra were measured on a spectrometer (Shimadzu 2600, Japan). Powder X-ray diffraction (PXRD) patterns carried by a D/max2500 VB2+/PC X-ray diffractometer (Rigaku) using Cu K $\alpha$  radiation in the 2 $\theta$  range 5-60°.



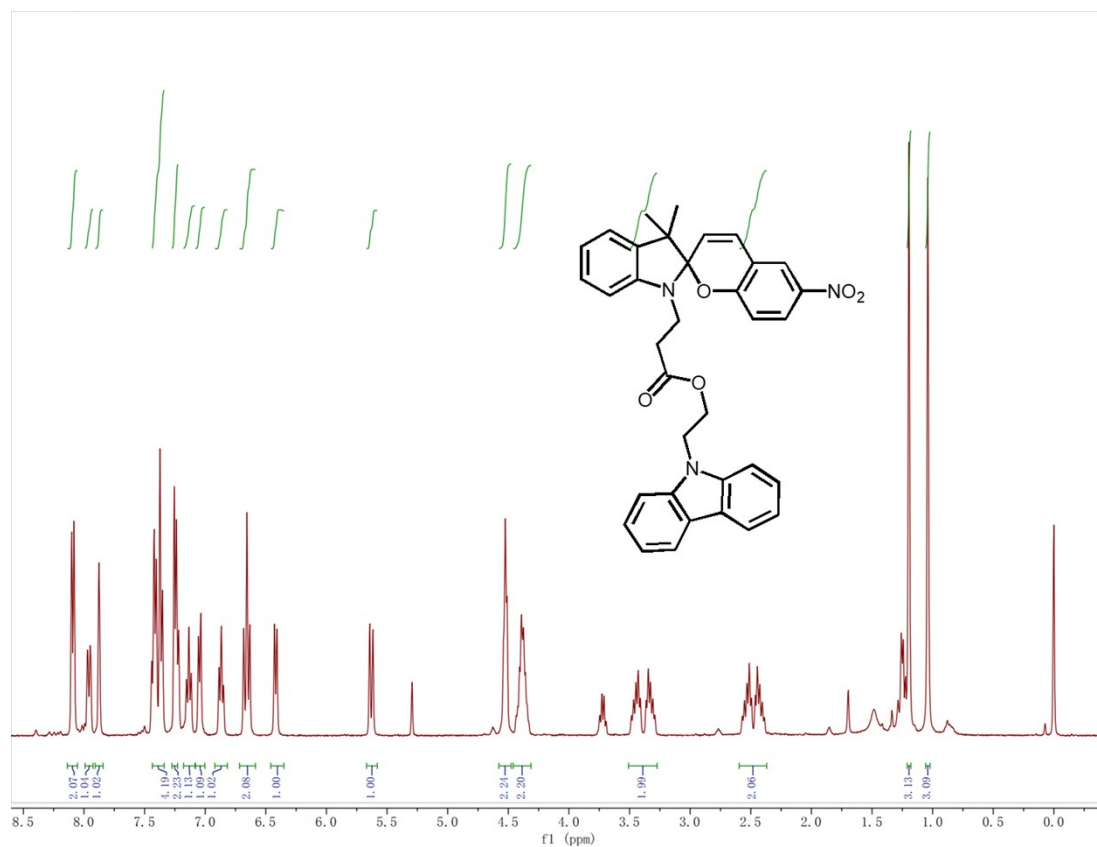

Figure S2. <sup>1</sup>H NMR of CZ-SP.

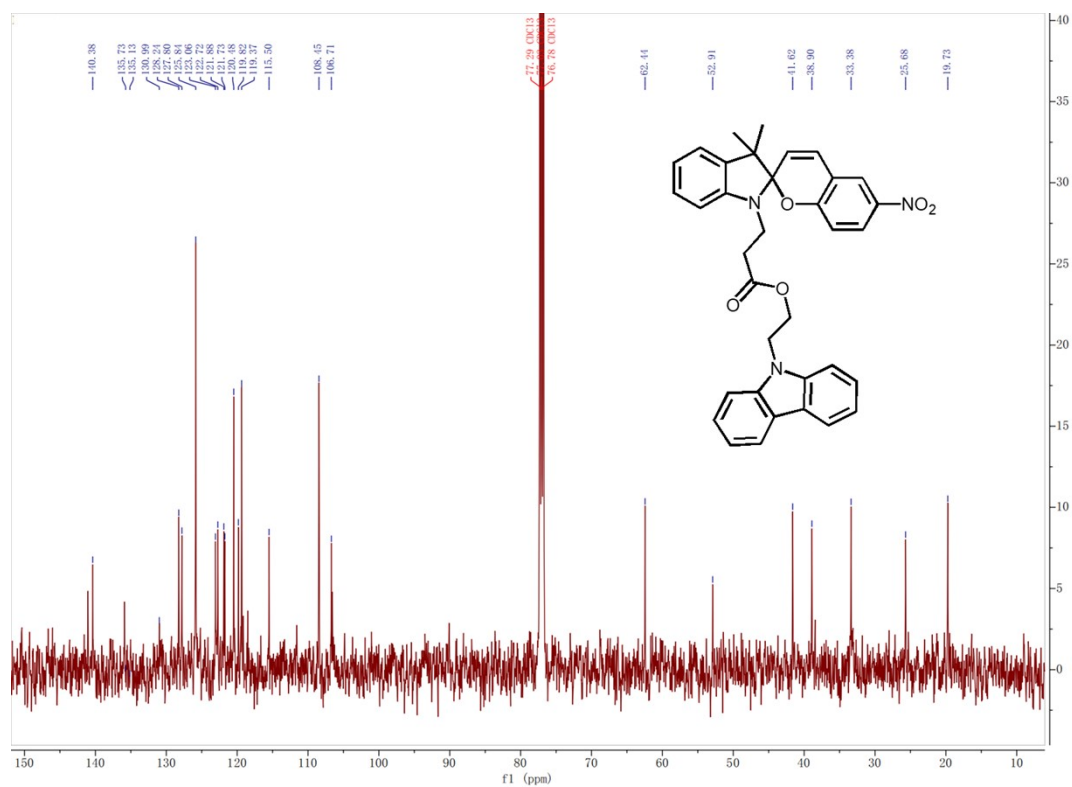

Figure S3. <sup>13</sup>C NMR of CZ-SP.

2310184103-H #13-15 RT: 0.09, 0.10 AV: 3 NL: 1.33E7  
T: FTMS+pESI Full lock.ms [80.0000-1200.0000]

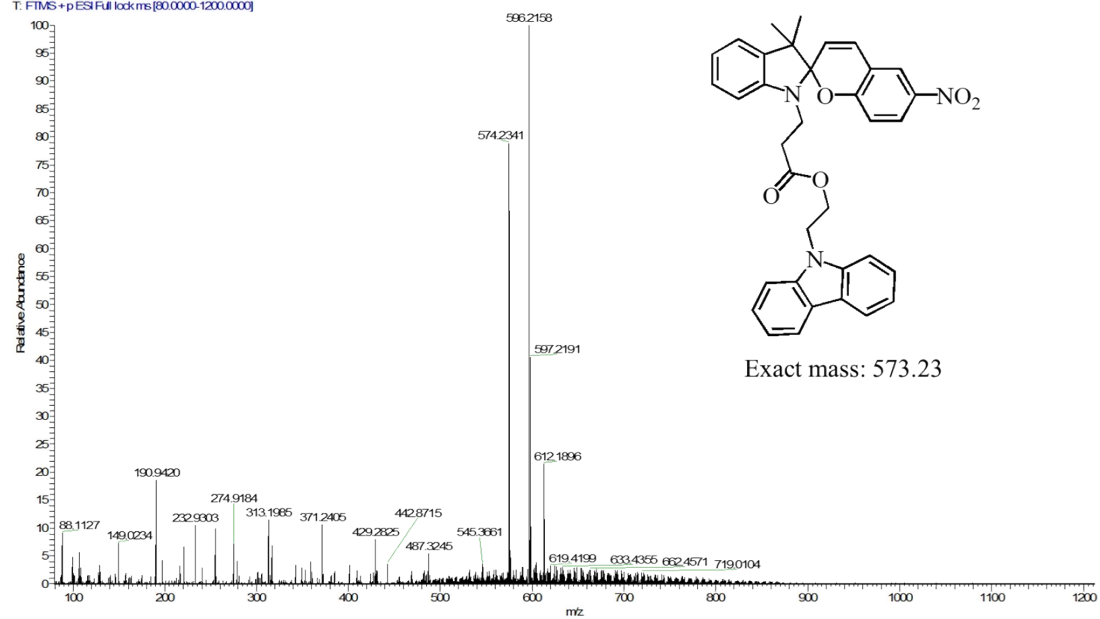

Figure S4. ESI-TOF of CZ-SP.

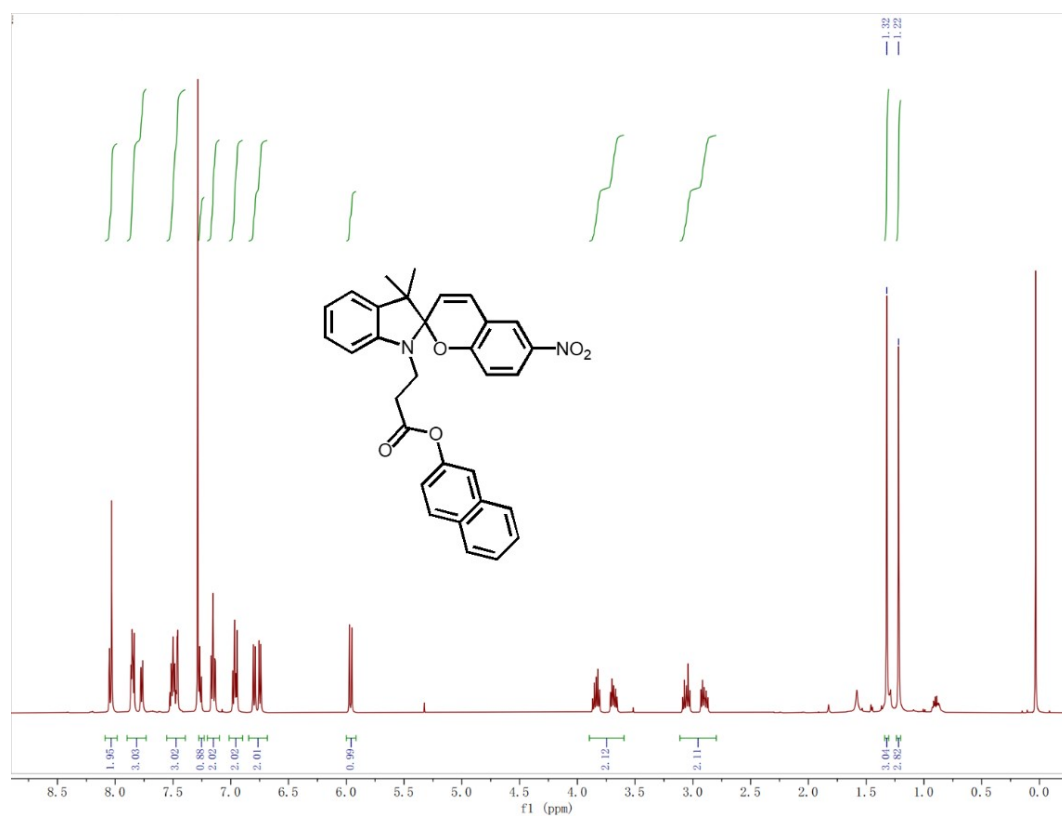

Figure S5.  $^1\text{H}$  NMR of NA-SP.

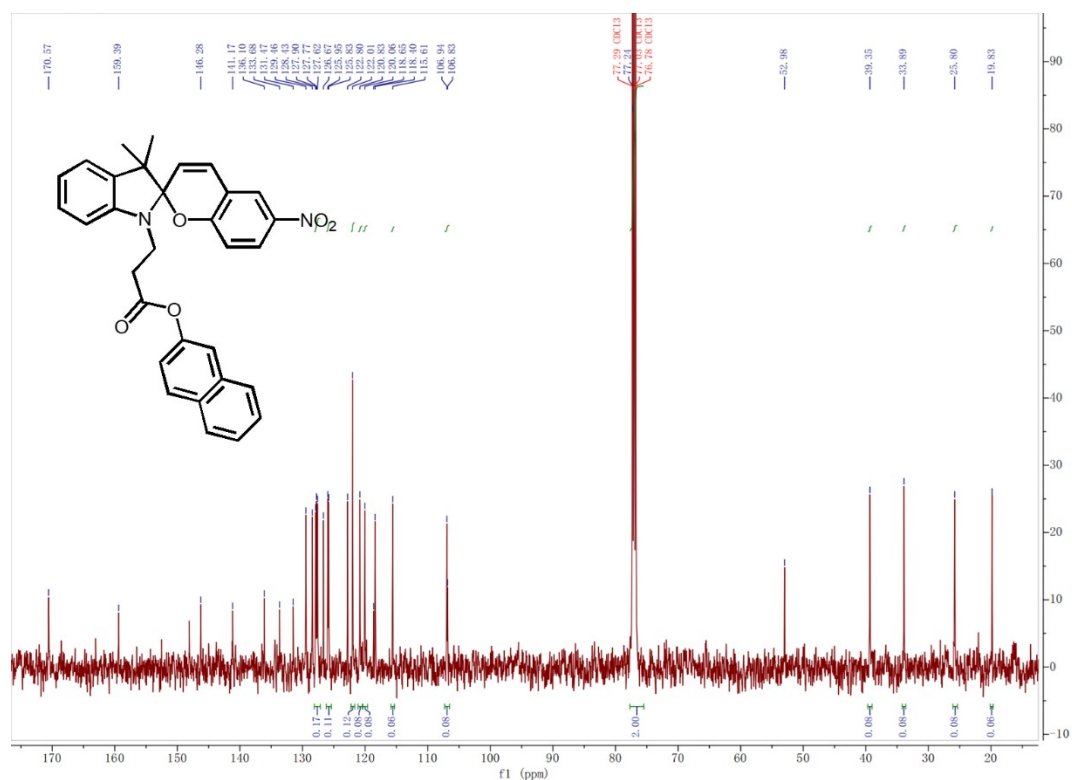

Figure S6. <sup>13</sup>C NMR of NA-SP.

2311289184-HY-1 #18-34 RT: 0.08-0.15 AV: 17 SB: 93 0.50-0.90 NL: 2.50E8  
T: FTMS + p ESI Full ms [400.0000-700.0000]

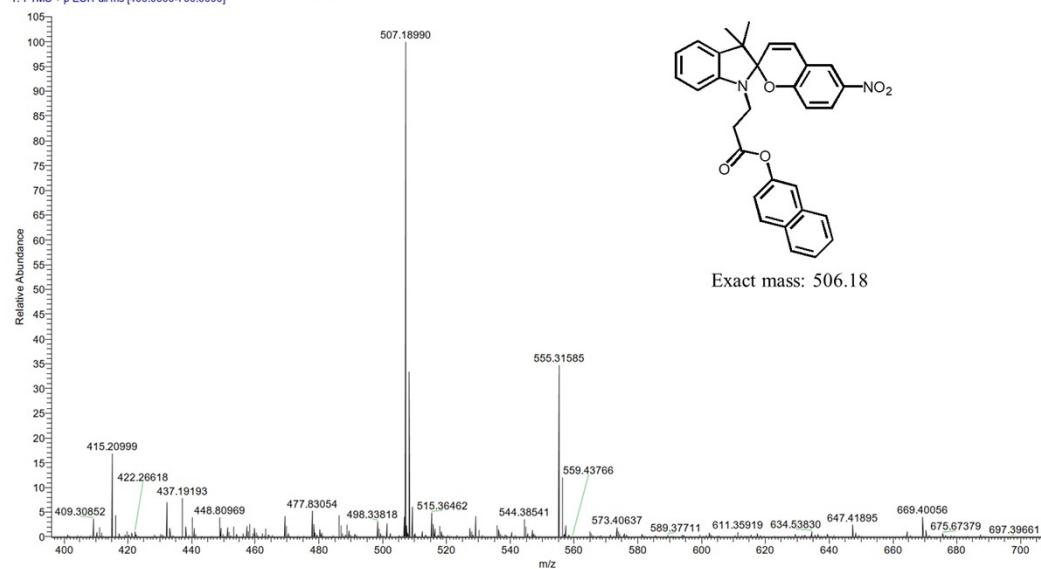

Figure S7. ESI-TOF of NA-SP.

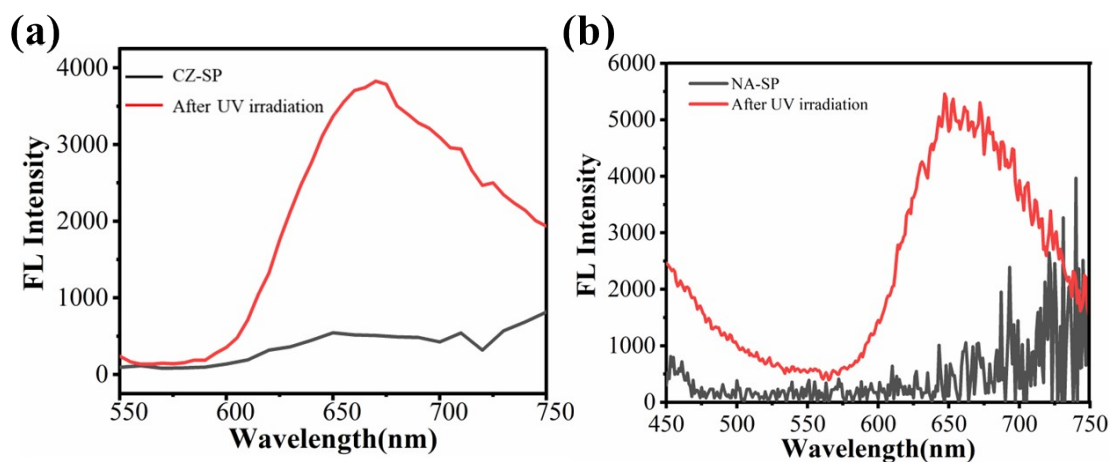

**Figure S8.** FL spectra of CZ-SP (a) and NA-SP (b) in DCM solution before and after UV irradiation for 30 s ( $\lambda_{\text{exc}} = 365$  nm).

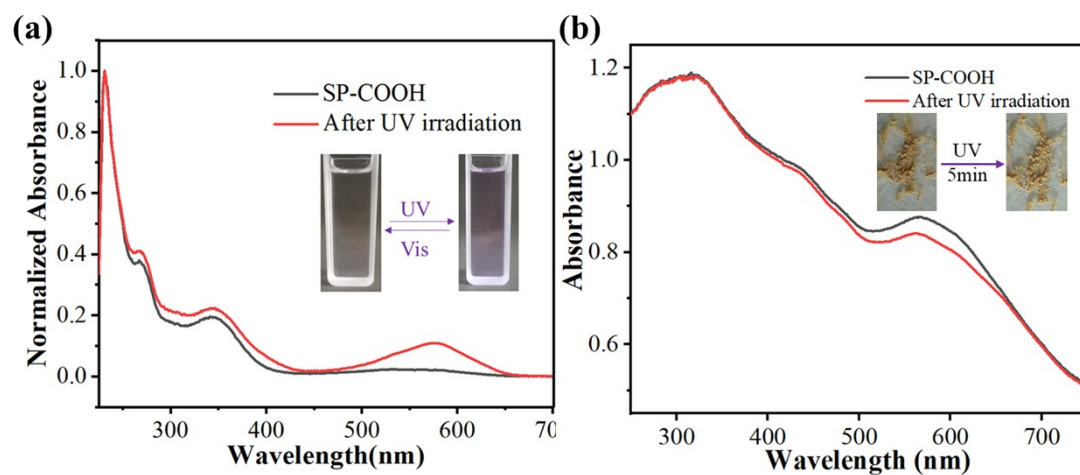

**Figure S9.** UV-vis absorption spectra of SP-COOH solution (a) and powders (b) before and after UV light irradiation (Inset: Images of SP-COOH solution and powder before and after UV irradiation under visible light).

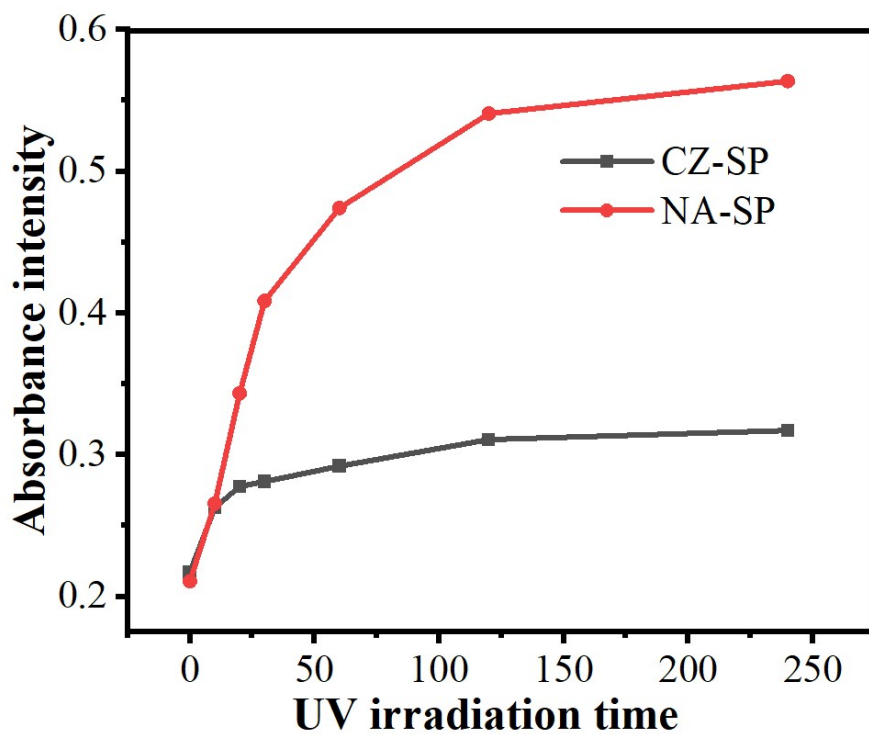

**Figure S10.** Absorbance intensity of NA-SP and CZ-SP under increased UV irradiation time.

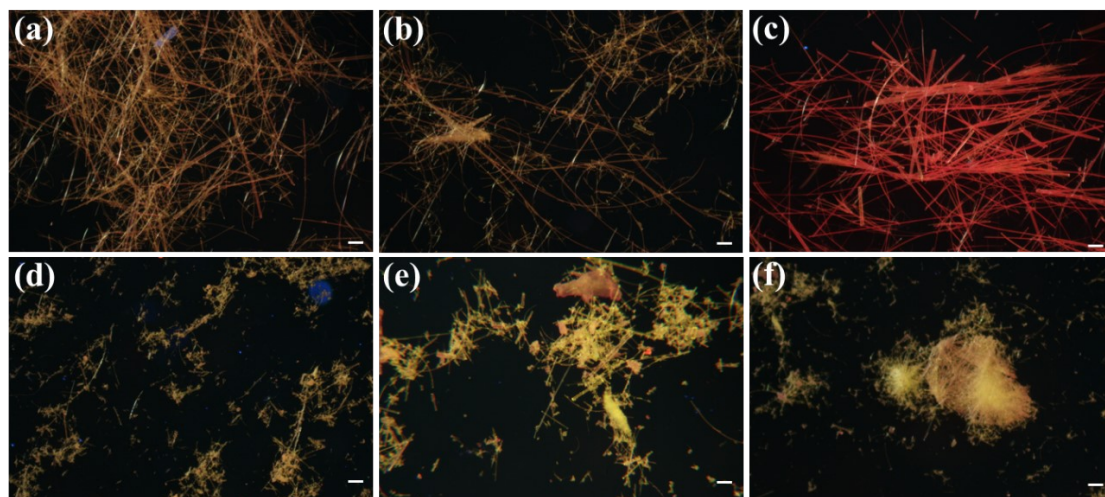

**Figure S11.** The fluorescence images of the as-prepared CZ-SP (a, b, c) and NA-SP microcrystals (d, e, f) under DCM : MeOH=1:2 (a, d), DCM : Hex=1:2 (b, e); DCM:PE=1:2 (c, f), volume ratio, respectively. Scale bar: 20  $\mu\text{m}$ . DCM is dichloromethane, MeOH is methanol, Hex is hexane, and PE is petroleum ether.

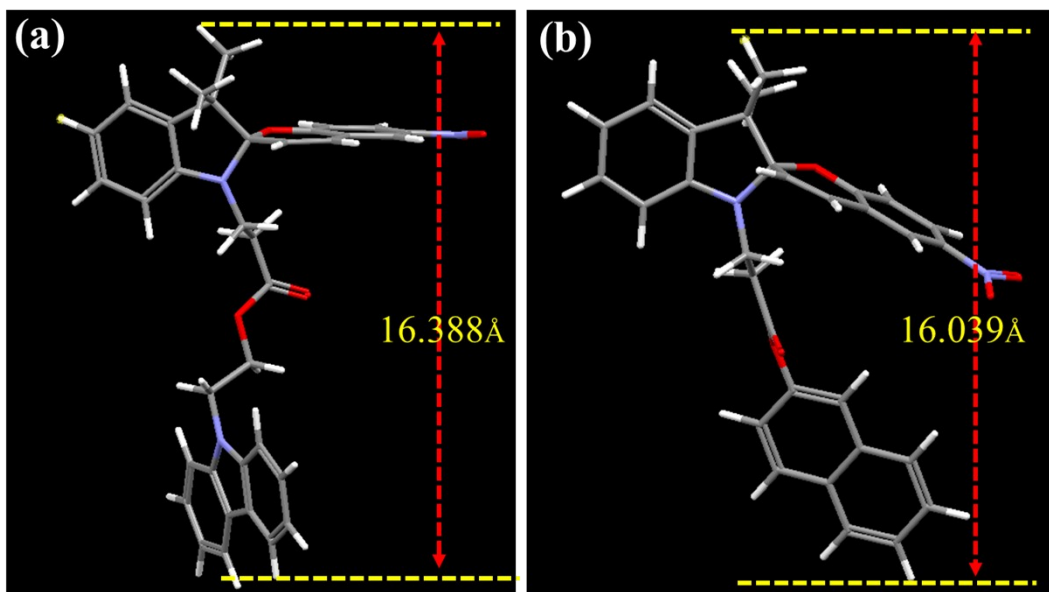

Figure S12. Geometric conformations of CZ-SP and NA-SP.

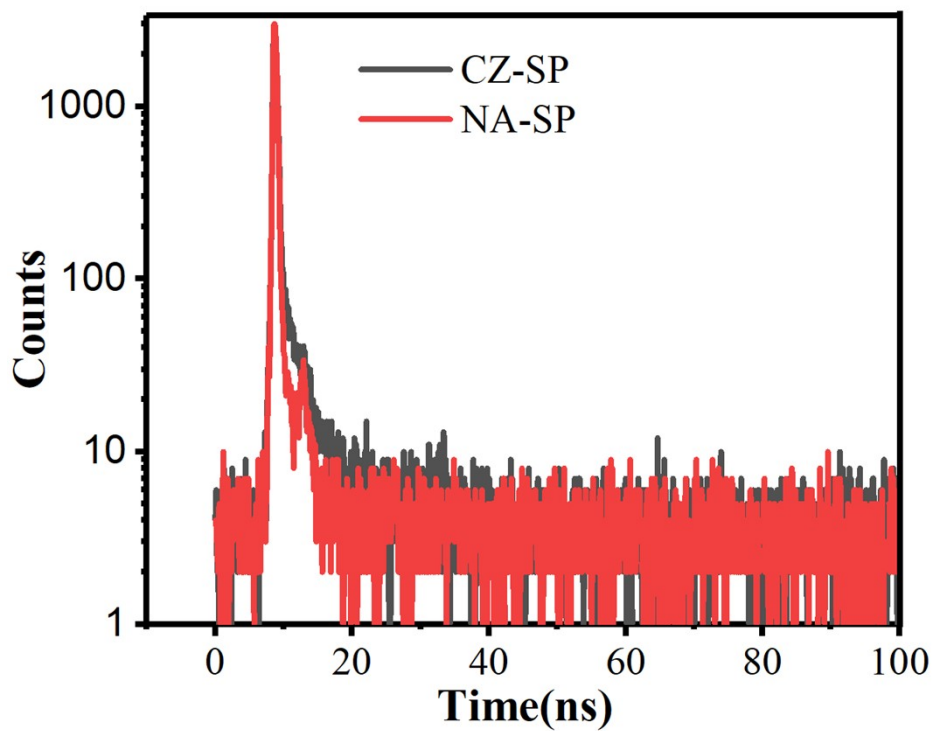

Figure S13. Transient decay spectra of CZ-SP and NA-SP powders under UV irradiation for 60 s.



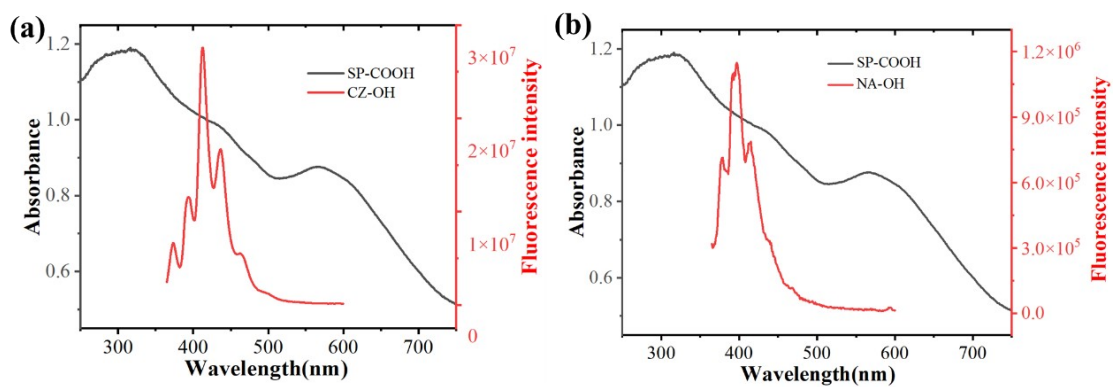

**Figure S14.** Overlap of SP-COOH absorption spectra and CZ-OH (a), NA-OH (b) fluorescence emission spectra in solid state ( $\lambda_{\text{exc}} = 365 \text{ nm}$ ).

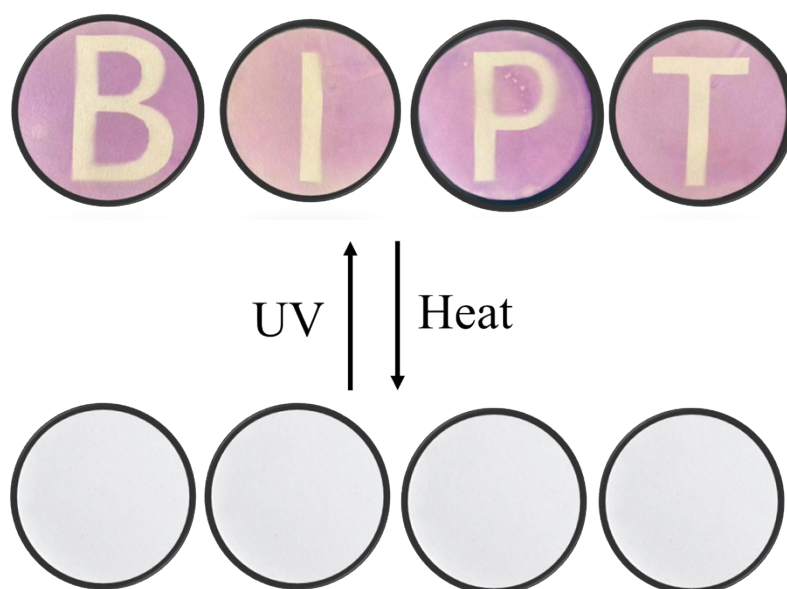

**Figure S15.** Reversible optical printing under alternating UV and heat treatment.

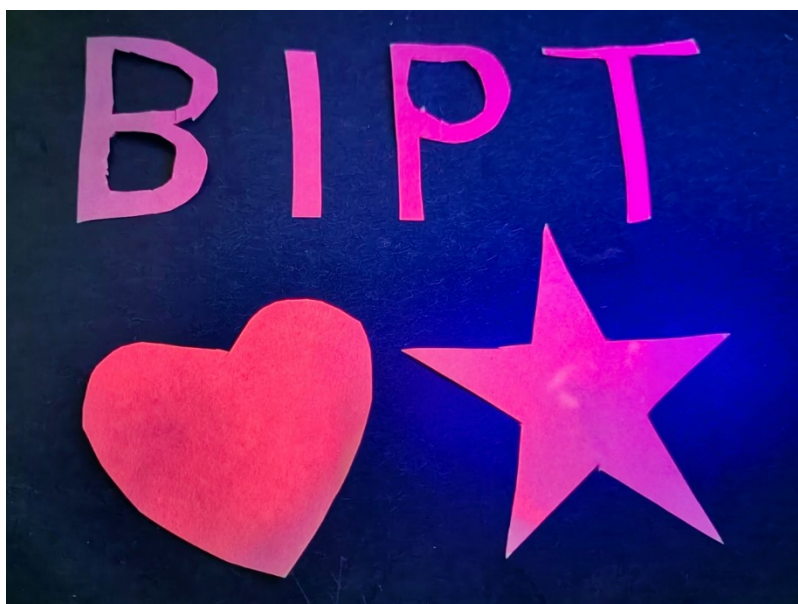

**Figure S16.** Fluorescent images of CZ-SP and NA-SP as an anti-counterfeiting ink on letters filter paper under UV irradiation for 60 s.

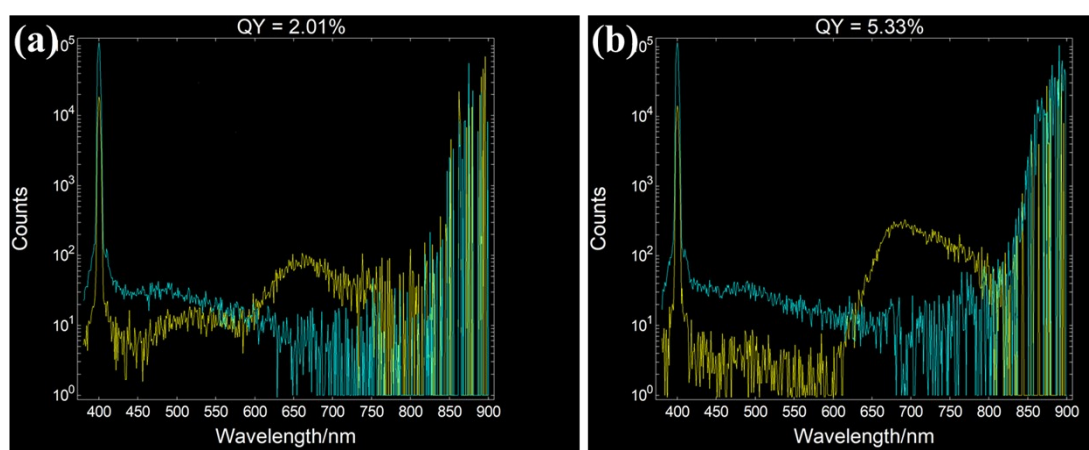

**Figure S17.** Fluorescence quantum yields of (a) CZ-SP and (b) NA-SP powder after UV irradiation for 60s. The emission range is from 600-750 nm.

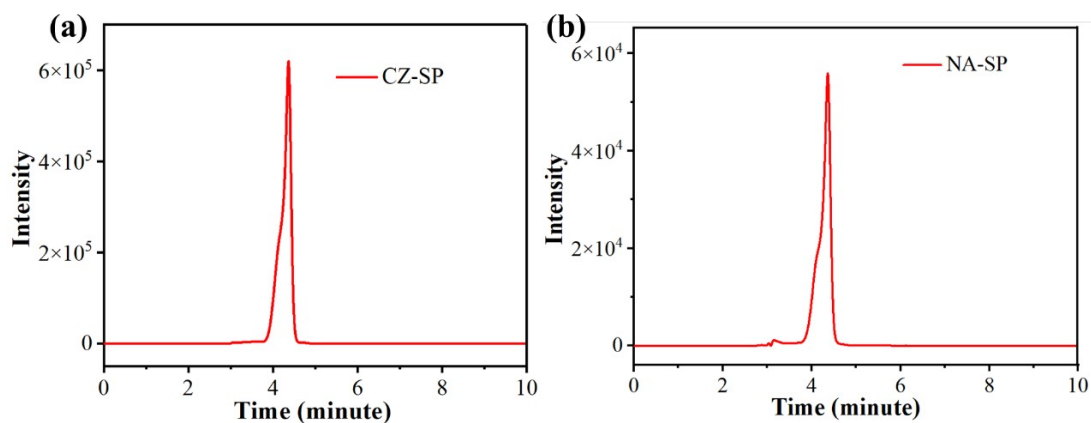

**Figure S18.** High performance liquid chromatography diagrams of (a) CZ-SP and (b) NA-SP.

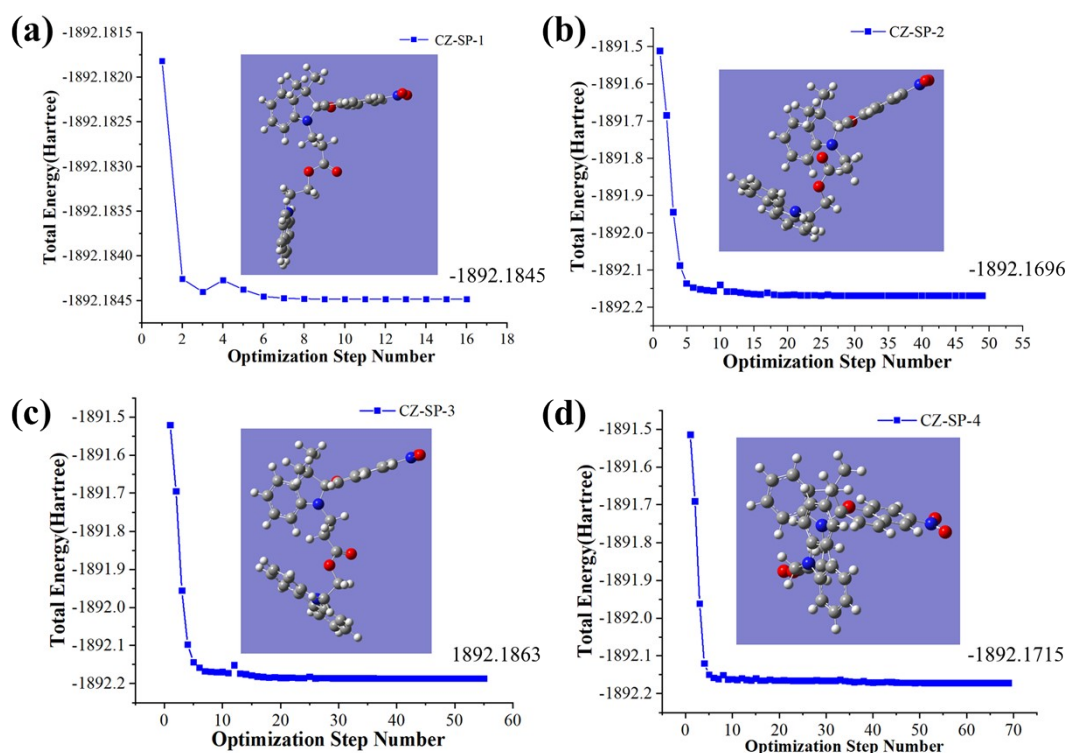

**Figure S19.** Four different geometries by adjusting flexible linkers in CZ-SP molecule from Materials Studio software (version 7.0). The four different geometries CZ-SP molecules are optimized by Materials Studio and total energies are calculated by density functional theory. Four different geometries CZ-SP molecules share very similar total energies.

**Table S1.** Fluorescence quantum efficiency and the lifetimes of CZ-SP and NA-SP powders after UV irradiation 60 s (365 nm).

| Sample | $\Phi_f$ (%) | $\tau_{FL}$ (ns) | $k_r$             |
|--------|--------------|------------------|-------------------|
| CZ-SP  | 2.0          | 1.14             | $1.7 \times 10^7$ |
| NA-SP  | 5.3          | 0.60             | $8.0 \times 10^7$ |

Radiative rates ( $k_r$ ) =  $\Phi_f/\tau_{FL}$ .
